# Supplementary material for: Highly efficient and reusable energy-absorbing metamaterials exploiting soft rate-dependent frictional interfaces
Source: Research Square preprint supplement (doi:10.21203/rs.3.rs-968295/v1), 2021-10-22
Supplement: Supplementary file 1 [file 2fc400673c2cd4cc2e1d952b.xlsx]

## Sheet: Fig 3b
Figure 3b
		Sample 1				Sample 2				Sample 3
h = 3 cm	d (mm)	Fp_test1 (N)	Fp_test2 (N)	Fp_test3 (N)	Fp_test4 (N)	Fp_test1 (N)	Fp_test2 (N)	Fp_test3 (N)	Fp_test4 (N)	Fp_test1 (N)	Fp_test2 (N)	Fp_test3 (N)	Fp_test4 (N)	Average value (N)	Standard deviation (N)
v = 30 mm/min	1.9	119.249	120.15	119.122	120.784	116.606	115.602	121.397	117.813	122.199	126.321	124.995	125.522	120.813	3.46241
	2	149.235	149.031	148.068	146.368	197.961	192.352	196.38	183.965	175.168	181.147	176.423	182.422	173.21	19.7842
	2.1	208.299	197.483	209.011	199.677	217.647	219.339	226.319	224.235	244.685	247.21	249.999	249.776	224.473	19.3948
		Sample 1				Sample 2				Sample 3
h = 4 cm	d (mm)	Fp_test1 (N)	Fp_test2 (N)	Fp_test3 (N)	Fp_test4 (N)	Fp_test1 (N)	Fp_test2 (N)	Fp_test3 (N)	Fp_test4 (N)	Fp_test1 (N)	Fp_test2 (N)	Fp_test3 (N)	Fp_test4 (N)	Average value (N)	Standard deviation (N)
v = 30 mm/min	1.9	152.079	155.628	150.731	158.127	176.098	166.144	174.351	171.085	158.752	160.299	158.188	162.724	162.017	8.31493
	2	250.311	239.193	239.947	236.769	223.077	224.489	222.885	226.191	257.786	259.322	256.62	261.022	241.468	15.1058
	2.1	313.368	315.611	312.247	326.82	288.393	289.859	283.989	286.317	305.717	304.314	305.985	305.918	303.212	13.3867
		Sample 1				Sample 2				Sample 3
h = 5 cm	d (mm)	Fp_test1 (N)	Fp_test2 (N)	Fp_test3 (N)	Fp_test4 (N)	Fp_test1 (N)	Fp_test2 (N)	Fp_test3 (N)	Fp_test4 (N)	Fp_test1 (N)	Fp_test2 (N)	Fp_test3 (N)	Fp_test4 (N)	Average value (N)	Standard deviation (N)
v = 30 mm/min	1.9	223.978	226.717	226.039	229.692	211.628	216.961	209.511	216.304	225.296	226.813	229.846	231.01	222.816	7.33482
	2	289.267	292.216	287.559	293.201	299.469	313.442	301.102	309.136	307.019	303.444	311.659	307.244	301.23	8.91286
	2.1	394.662	403.49	397.553	407.65	384.109	385.138	375.618	383.32	404.755	398.047	410.65	406.101	395.924	11.3979
Figure 3b and Figure 3c share the same data

## Sheet: Fig 3c
Figure 3c
		Sample 1				Sample 2				Sample 3
d = 1.9 mm	h (cm)	Fp_test1 (N)	Fp_test2 (N)	Fp_test3 (N)	Fp_test4 (N)	Fp_test1 (N)	Fp_test2 (N)	Fp_test3 (N)	Fp_test4 (N)	Fp_test1 (N)	Fp_test2 (N)	Fp_test3 (N)	Fp_test4 (N)	Average value (N)	Standard deviation (N)
v = 30 mm/min	3	119.249	120.15	119.122	120.784	116.606	115.602	121.397	117.813	122.199	126.321	124.995	125.522	120.813	3.46241
	4	152.079	155.628	150.731	158.127	176.098	166.144	174.351	171.085	158.752	160.299	158.188	162.724	162.017	8.31493
	5	223.978	226.717	226.039	229.692	211.628	216.961	209.511	216.304	225.296	226.813	229.846	231.01	222.816	7.33482
		Sample 1				Sample 2				Sample 3
d = 2.0 mm	h (cm)	Fp_test1 (N)	Fp_test2 (N)	Fp_test3 (N)	Fp_test4 (N)	Fp_test1 (N)	Fp_test2 (N)	Fp_test3 (N)	Fp_test4 (N)	Fp_test1 (N)	Fp_test2 (N)	Fp_test3 (N)	Fp_test4 (N)	Average value (N)	Standard deviation (N)
v = 30 mm/min	3	149.235	149.031	148.068	146.368	197.961	192.352	196.38	183.965	175.168	181.147	176.423	182.422	173.21	19.7842
	4	250.311	239.193	239.947	236.769	223.077	224.489	222.885	226.191	257.786	259.322	256.62	261.022	241.468	15.1058
	5	289.267	292.216	287.559	293.201	299.469	313.442	301.102	309.136	307.019	303.444	311.659	307.244	301.23	8.91286
		Sample 1				Sample 2				Sample 3
d = 2.1 mm	h (cm)	Fp_test1 (N)	Fp_test2 (N)	Fp_test3 (N)	Fp_test4 (N)	Fp_test1 (N)	Fp_test2 (N)	Fp_test3 (N)	Fp_test4 (N)	Fp_test1 (N)	Fp_test2 (N)	Fp_test3 (N)	Fp_test4 (N)	Average value (N)	Standard deviation (N)
v = 30 mm/min	3	208.299	197.483	209.011	199.677	217.647	219.339	226.319	224.235	244.685	247.21	249.999	249.776	224.473	19.3948
	4	313.368	315.611	312.247	326.82	288.393	289.859	283.989	286.317	305.717	304.314	305.985	305.918	303.212	13.3867
	5	394.662	403.49	397.553	407.65	384.109	385.138	375.618	383.32	404.755	398.047	410.65	406.101	395.924	11.3979
Figure 3b and Figure 3c share the same data

## Sheet: Fig 3d
Figure 3d
		Sample 1				Sample 2				Sample 3
d = 2.0 mm	v (mm/min)	Fp_test1 (N)	Fp_test2 (N)	Fp_test3 (N)	Fp_test4 (N)	Fp_test1 (N)	Fp_test2 (N)	Fp_test3 (N)	Fp_test4 (N)	Fp_test1 (N)	Fp_test2 (N)	Fp_test3 (N)	Fp_test4 (N)	Average value (N)	Standard deviation (N)
h = 3 cm	5	102.885	97.3513	96.1484	106.711	119.642	118.741	123.116	119.345	107.805	106.65	104.947	109.249	109.383	8.94216
	15	123.225	122.225	123.733	121.781	160.541	157.826	162.081	155.187	141.671	144.472	143.153	145.223	141.76	15.5934
	30	149.235	149.031	148.068	146.368	197.961	192.352	196.38	183.965	175.168	181.147	176.423	182.422	173.21	19.7842
	56.5	178.662	184.245	181.614	185.484	224.308	231.93	231.333	243.135	215.098	226.965	220.327	226.798	212.492	23.1967
	94.2	211.744	217.861	215.172	220.968	263.845	275.002	267.419	279.718	251.82	259.651	255.636	263.487	248.527	24.9357
	282.7	277.88	284.008	283.242	289.176	327.251	338.436	329.805	334.794	317.043	326.718	318.506	321.066	312.327	22.2158
	471.2	308.427	310.536	304.012	311.368	342.26	353.968	347.128	355.808	337.312	347.302	339.68	346.765	333.714	19.3368
	500	314.153	319.415	316.474	319.381	358.857	350.418	357.18	350.936	344.707	340.376	346.066	340.458	338.202	16.4309

## Sheet: Fig 3e
Figure 3e
Coefficient of friction µ
		Sample 1	Sample 2
		t = 0.42 mm	t = 1.3 mm
	v (mm/min)	µ	µ	Average value	Standard deviation
	56.5487	0.369	0.403	0.386	0.02404
	94.2478	0.385	0.408	0.3965	0.01626
	282.743	0.452	0.462	0.457	0.00707
	471.239	0.502	0.507	0.5045	0.00354

## Sheet: Fig 3h
Figure 3h
Data from Fig. 3d
		Sample 1				Sample 2				Sample 3
d = 2.0 mm	v (mm/min)	Fp_test1 (N)	Fp_test2 (N)	Fp_test3 (N)	Fp_test4 (N)	Fp_test1 (N)	Fp_test2 (N)	Fp_test3 (N)	Fp_test4 (N)	Fp_test1 (N)	Fp_test2 (N)	Fp_test3 (N)	Fp_test4 (N)	Average value (N)	Standard deviation (N)
h = 3 cm	56.5	178.662	184.245	181.614	185.484	224.308	231.93	231.333	243.135	215.098	226.965	220.327	226.798	212.492	23.1967
	94.2	211.744	217.861	215.172	220.968	263.845	275.002	267.419	279.718	251.82	259.651	255.636	263.487	248.527	24.9357
	282.7	277.88	284.008	283.242	289.176	327.251	338.436	329.805	334.794	317.043	326.718	318.506	321.066	312.327	22.2158
	471.2	308.427	310.536	304.012	311.368	342.26	353.968	347.128	355.808	337.312	347.302	339.68	346.765	333.714	19.3368
FEM nonlinear data
	v (mm/min)	µ_average	F_simulated (N)
	56.5487	0.386	211.6
	94.2478	0.3965	221.2
	282.743	0.457	280.4
	471.239	0.5045	344.4

## Sheet: Fig 4d
Figure 4d
v (mm/min)	Fp (N)
30	1299.82
56.5	1483.07
94.2	1608.9
282.7	1917.57
500	2153.29

## Sheet: Fig 4f
Figure 4f
v (mm/min)	Fp (N)
30	1123.57
56.5	1200.37
94.2	1329.39
282.7	1534.24
500	1623.56

## Sheet: Fig 5 and Supplementary Fig. 6
Figure 5 and Supplementary Fig. 6
Previous work	Material	Energy-absorbing capacity for the first cycle (MJ/m^3)	Energy-absorbing capacity for the first cycle (KJ/kg)	Tested recycle numbers	If the capacity decreases notably versus cycles	Energy-absorbing capacity for the last cycle (MJ/m^3)	Energy-absorbing capacity for the last cycle (KJ/kg)	Reference
one-time-usage materials	titanium foam	55.6	42.9842	1				Xie, B., Fan, Y. Z., Mu, T. Z. & Deng, B. Fabrication and energy absorption properties of titanium foam with CaCl2 as a space holder. Mater. Sci. Eng. A-Struct. Mater. Prop. Microstruct. Process. 708, 419–423 (2017).
	AlSi10Mg foam	28.7079	27.6836	1				Stanev, L., Drenchev, B., Yotov, A., Lazarova, R. Compressive Properties and Energy Absorption Behaviour of AlSi10Mg Open-Cell Foam. J. Mater. Sci. Technol. 22, 44–53 (2014).
	stainless steel foam	1.8306	0.3009	1				Alvandi-Tabrizi, Y. & Rabiei, A. Use of Composite Metal Foam for Improving Absorption of Collision Forces. Procedia Mater. Sci. 4, 377–382 (2014).
	nickel Foam	0.335	1.2063	1				Fan, S-f., et al. Compressive properties and energy absorption characteristics of open-cell nickel foams. Trans. Nonferrous Met. Soc. China 27, 117–124 (2017).
	CNT/Al Alloy 5083 Foam	6.35	7.8395	1				Aldoshan, A. & Khanna, S. Effect of relative density on the dynamic compressive behavior of carbon nanotube reinforced aluminum foam. Mater. Sci. Eng. A-Struct. Mater. Prop. Microstruct. Process. 689, 17–24 (2017).
phase-transforming materials	gallium and polymer (SEBS)	10.1556	4.6	3	Yes	5.4764	2.7	Cooper, C. B. et al. Toughening stretchable fibers via serial fracturing of a metallic core. Sci. Adv. 5, eaat4600 (2019).
	polylactide(PLA) and carbon fibers	3.328	8.32	4	Yes	0.7205	1.8	Cheng, Y., Li, J., Qian, X. & Rudykh, S. 3D printed recoverable honeycomb composites reinforced by continuous carbon fibers. Compos. Struct. 268, 113974 (2021).
damage-tolerant micro-lattices	nickel microlattices	0.004	0.28	6	Yes	0.00056	0.04	Schaedler, T. A. et al. Ultralight metallic microlattices. Science 334, 962–965 (2011).
	nickel microlattices	0.0061	0.185	3	Yes	0.002	0.061	Zheng, X. et al. Multiscale metallic metamaterials. Nat. Mater. 15, 1100–1106 (2016).
	durable resin	1.4	3.6	3	Yes	0.8927	2.2	Ling, C., Cernicchi, A., Gilchrist, M. D. & Cardiff, P. Mechanical behaviour of additively-manufactured polymeric octet-truss lattice structures under quasi-static and dynamic compressive loading. Mater. Des. 162, 106–118 (2019).
mechanical instability mainly	thermoplastic polyurethanes (TPU)	0.0082	0.014	7	No			Haghpanah, B., Salari-Sharif, L., Pourrajab, P., Hopkins, J., Valdevit, L. Multistable Shape-Reconfigurable Architected Materials. Adv. Mater. 28, 7915–7920 (2016).
	photoresist (IP-S)	0.0156	0.15	80	No			Frenzel, T., Findeisen, C., Kadic, M., Gumbsch, P., Wegener, M. Tailored Buckling Microlattices as Reusable Light-Weight Shock Absorbers. Adv. Mater. 28, 5865–5870 (2016).
	silicone-based link	0.0011	0.0032	20	No			Shan, S. et al. Multistable architected materials for trapping elastic strain energy. Adv. Mater. 27, 4296–4301 (2015).
	polylactic acid (PLA)	0.0497	0.27	9	No			Zhu, S., et al. Bio-inspired multistable metamaterials with reusable large deformation and ultra-high mechanical performance. Extreme. Mech. Lett. 32, 100548 (2019).
	Ti-6Al-4V	2.9	6.14	9	Yes	1.9846	4.17	Zhu, S., et al. Bio-inspired multistable metamaterials with reusable large deformation and ultra-high mechanical performance. Extreme. Mech. Lett. 32, 100548 (2019).
mechanical instability and friction between hard constituents	polycarbonate tubes and rubber bands	0.0031	0.0048	4	No			Fu, K., Zhao, Z. & Jin, L. Programmable granular metamaterials for reusable energy absorption. Adv. Funct. Mater. 29, 1901258 (2019).
	polymerized photoresist	0.0008	0.0021	60	No			Garland, A. P. et al. Coulombic friction in metamaterials to dissipate mechanical energy. Extreme Mech. Lett. 40, 100847 (2020).
	Sil40 and groudn coffee	0.023	0.072	24	No			Wang, Y. et al. Architected lattices with adaptive energy absorption. Extreme Mech. Lett. 33, 100557 (2019).
This work				Description
friction between soft and hard constituents	Steel rods	1.04	1.15	v = 500 mm/min, h = 3 cm, d = 2 mm
	Carbon-fiber rods	0.793178	2.62268	v = 30 mm/min, h = 3 cm, d = 2 mm
	Carbon-fiber rods	1.28543	4.25035	v = 500 mm/min, h = 3 cm, d = 2 mm
	Kevlar ropes	9.05312	6.80331	v = 30 mm/min, h = 10 cm, d = 1.2 mm
	Kevlar ropes	13.0493	9.8064	v = 500 mm/min, h = 10 cm, d = 1.2 mm
	Recoverable	0.128391	0.0864784	v = 1 mm/min, h = 1 cm, d = 2 mm
	Recoverable	0.262212	0.176614	v = 30 mm/min, h = 1 cm, d = 2 mm
	Recoverable	0.353403	0.238036	v = 500 mm/min, h = 1 cm, d = 2 mm

## Sheet: Supplementary Fig 3d
Supplementary Figure 3d
	Sample 1	Sample 2
	t = 0.42 mm	t = 1.3 mm
v (mm/min)	µ	µ	Average value	Standard deviation
56.5487	0.369	0.403	0.386	0.02404
94.2478	0.385	0.408	0.3965	0.01626
282.743	0.452	0.462	0.457	0.00707
471.239	0.502	0.507	0.5045	0.00354
942.478	0.579	0.586	0.5825	0.00495
1884.96	0.677	0.693	0.685	0.01131
